# Supplementary material for: Coupling between surface ozone and leaf area index in a chemical transport model: Strength of feedback and implications for ozone air quality and vegetation health
Source: Copernicus journal article supplement (doi:10.5194/acp-2018-351), 2018-05-04
Supplement: Supplementary file 1 [file acp-2018-351-supplement.pdf]

*Supplement of*

**Coupling between surface ozone and leaf area index in a chemical transport model:**

**Strength of feedback and implications for ozone air quality and vegetation health**

Shan S. Zhou et al.

*Correspondence to:* A. P. K. Tai (amostai@cuhk.edu.hk)

Table S1: Plant functional types (PFTs) and their short names in CLM4.5.

| No. | Plant functional type                 | Short name    |
|-----|---------------------------------------|---------------|
| 1   | Needleleaf evergreen tree – temperate | NET Temperate |
| 2   | Needleleaf evergreen tree – boreal    | NET Boreal    |
| 3   | Needleleaf deciduous tree – boreal    | NDT Boreal    |
| 4   | Broadleaf evergreen tree – tropical   | BET Tropical  |
| 5   | Broadleaf evergreen tree – temperate  | BET Temperate |
| 6   | Broadleaf deciduous tree – tropical   | BDT Tropical  |
| 7   | Broadleaf deciduous tree – temperate  | BDT Temperate |
| 8   | Broadleaf deciduous tree – boreal     | BDT Boreal    |
| 9   | Broadleaf evergreen shrub – temperate | BES Temperate |
| 10  | Broadleaf deciduous shrub – temperate | BDS Temperate |
| 11  | Broadleaf deciduous shrub – boreal    | BDS Boreal    |
| 12  | C <sub>3</sub> arctic grass           | –             |
| 13  | C <sub>3</sub> grass                  | –             |
| 14  | C <sub>4</sub> grass                  | –             |
| 15  | C <sub>3</sub> unmanaged rainfed crop | Rainfed Crop  |

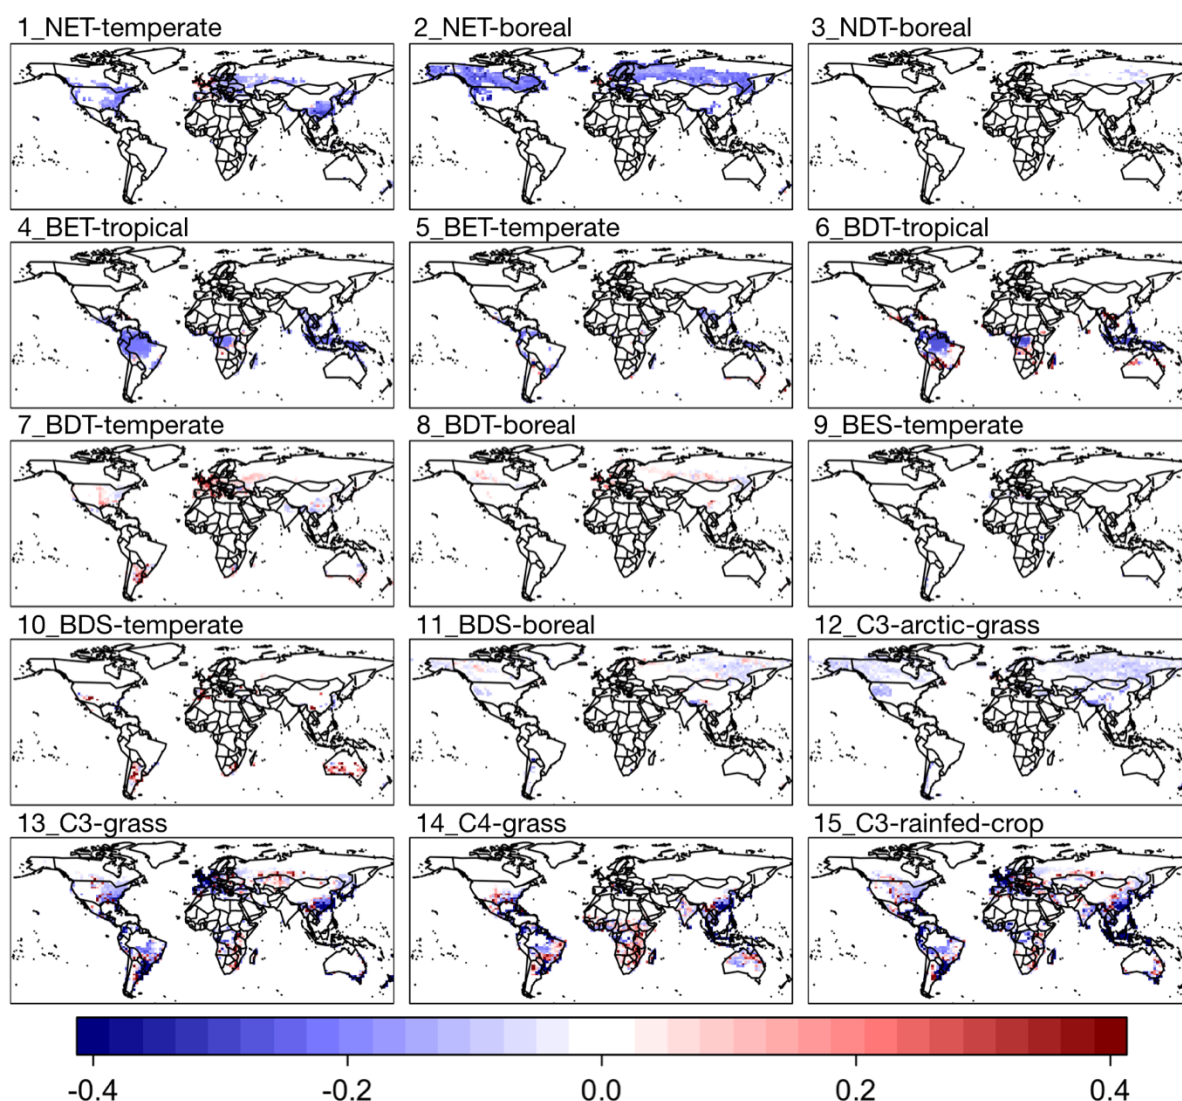

**Figure S1:** Fitted parameter,  $\gamma_\infty$  in Eq. (8) of the main text, minus one (i.e.,  $\gamma_\infty - 1$ ) for the 15 plant functional types (PFTs) represented in the Community Land Model (CLM4.5). The fitting is done for each month of the year, and here the annual average values are shown. Monthly values can be obtained by request.

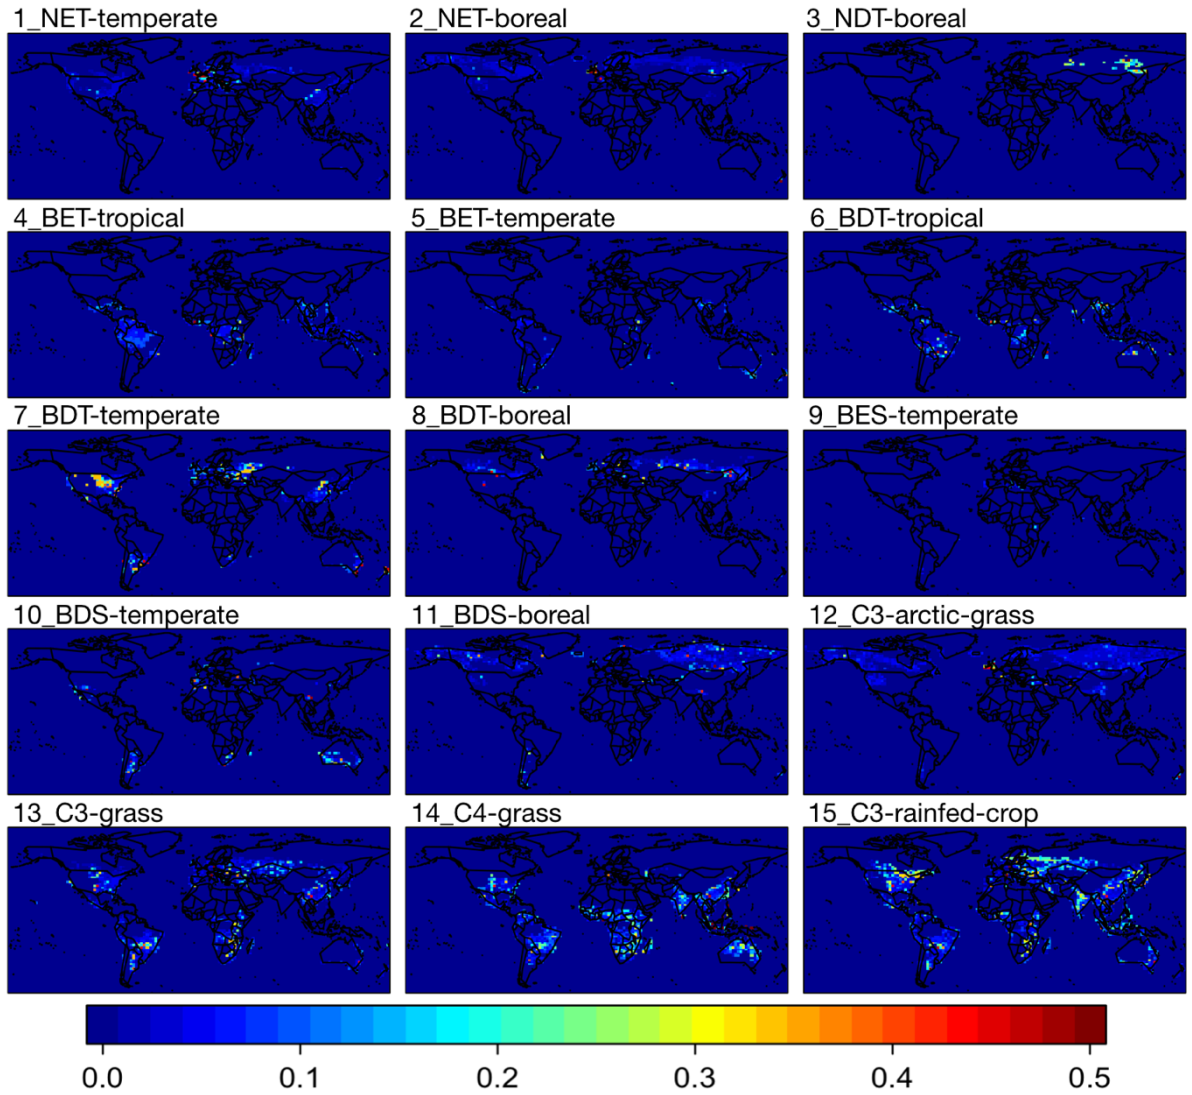

**Figure S2:** Fitted parameter,  $k$  in Eq. (8) of the main text, for the 15 plant functional types (PFTs) represented in the Community Land Model (CLM4.5). The fitting is done for each month of the year, and here the annual average values are shown. Monthly values can be obtained by request.

(a) JJA intact LAI

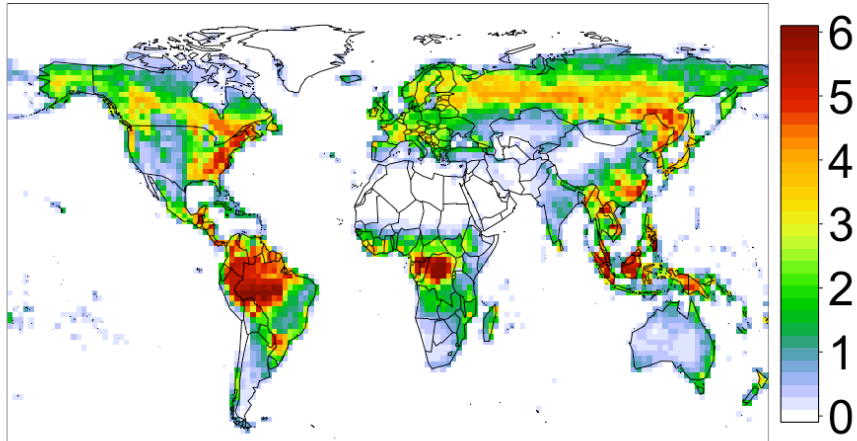

(b) LAI % changes

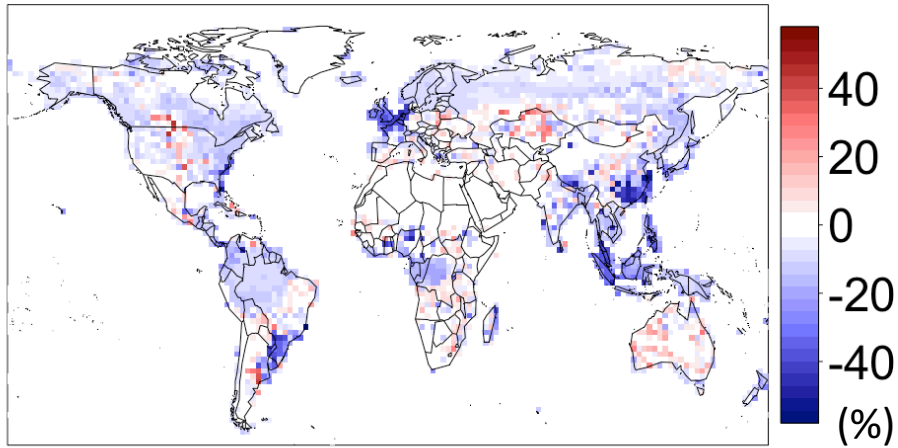

**Figure S3:** (a) Intact potential leaf area index (LAI) unaffected by ozone exposure in summer (JJA mean) as calculated by Eq. (9) in the main text; and (b) percentage changes in mean JJA LAI due to synchronous ozone-LAI coupling.

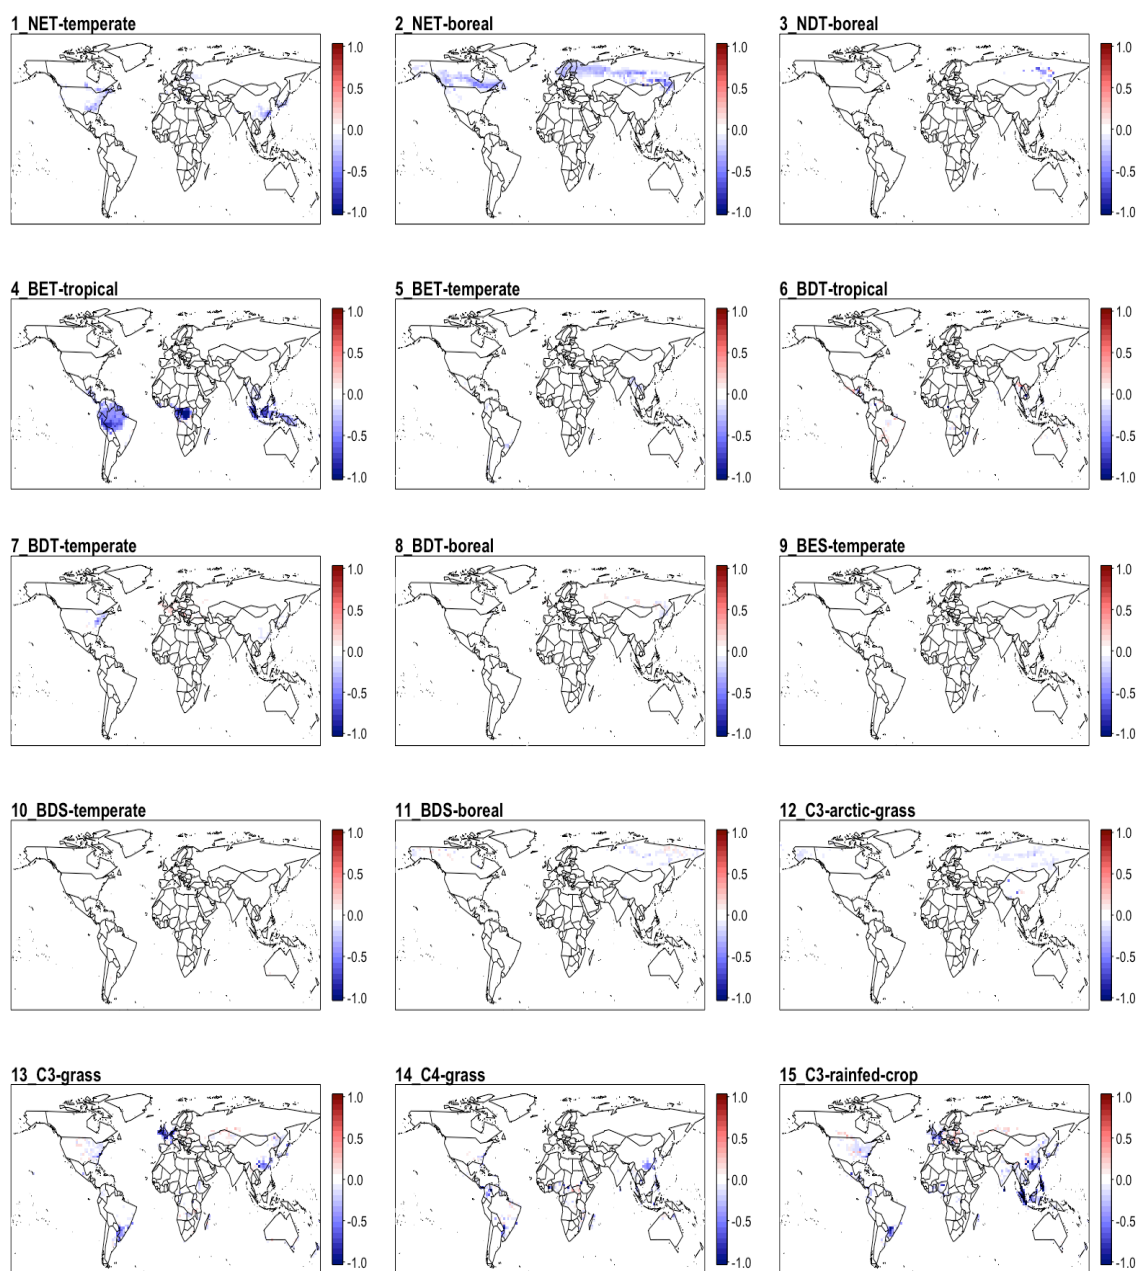

**Figure S4:** Changes in PFT-level leaf area index (LAI) between ozone-affected PFT-level LAI and intact potential PFT-level LAI unaffected by ozone in summer (acronyms are listed in Table S1).

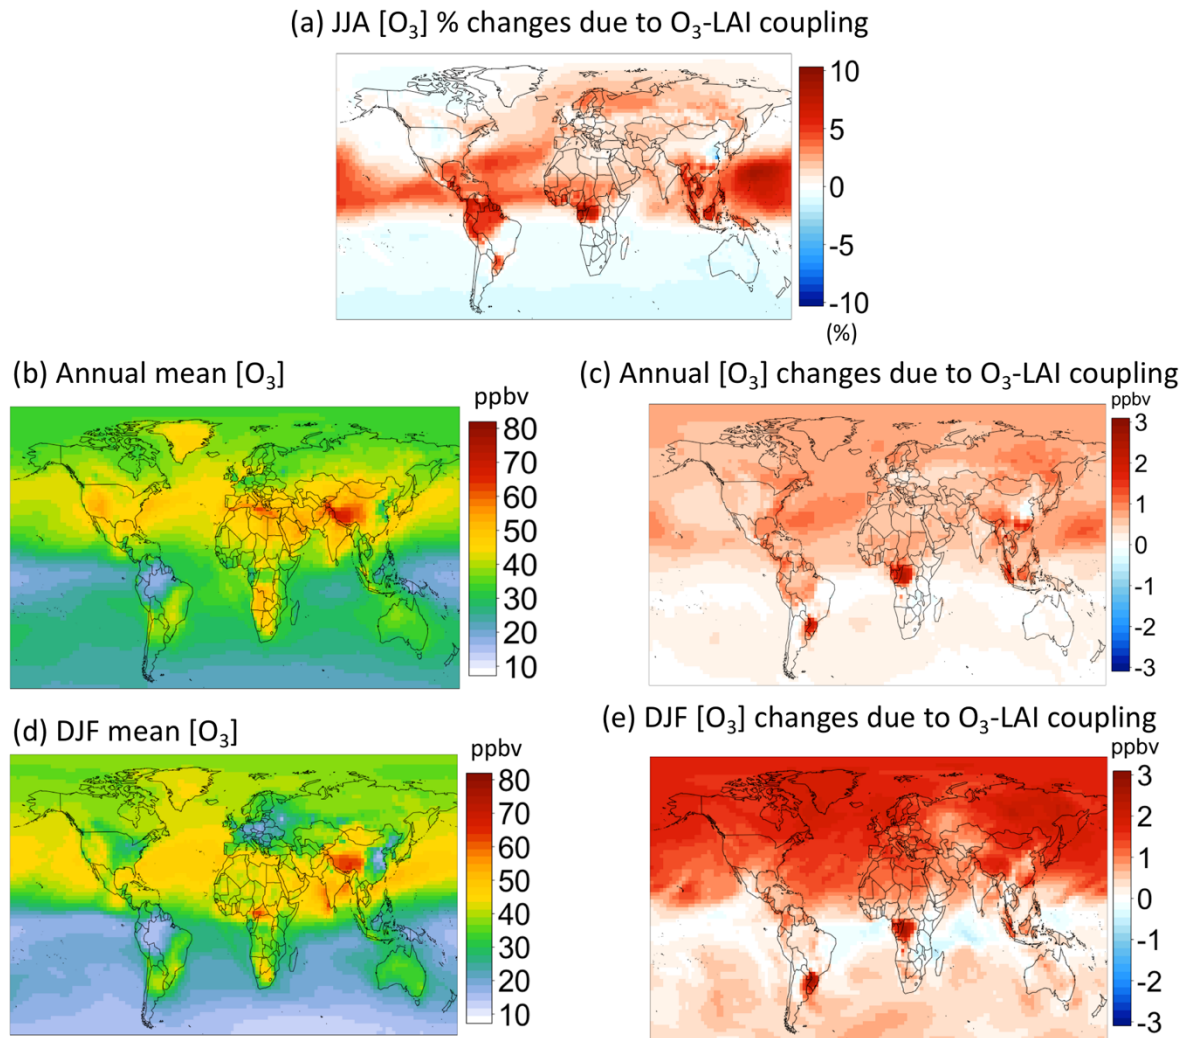

**Figure S5:** (a) Percentage changes in surface ozone concentration between the *[Affected LAI]* and *[Intact LAI]* case in summer (JJA mean); (b) and (d) Annual mean and boreal wintertime (DJF) mean surface ozone concentrations with ozone-affected leaf area index (LAI) from the *[Affected LAI]* case; and (c) and (e) differences in annual mean and DJF mean ozone concentrations between the *[Affected LAI]* and *[Intact LAI]* case (i.e.,  $[Affected\ LAI] - [Intact\ LAI]$ ).



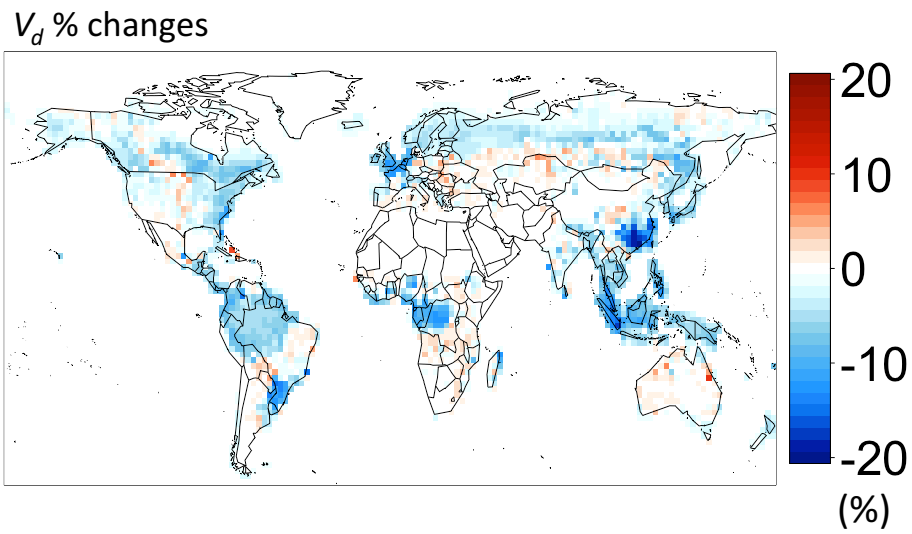

**Figure S6:** Percentage changes in summertime (JJA) ozone dry deposition velocity between the *[Affected LAI]* and *[Intact LAI]* case.

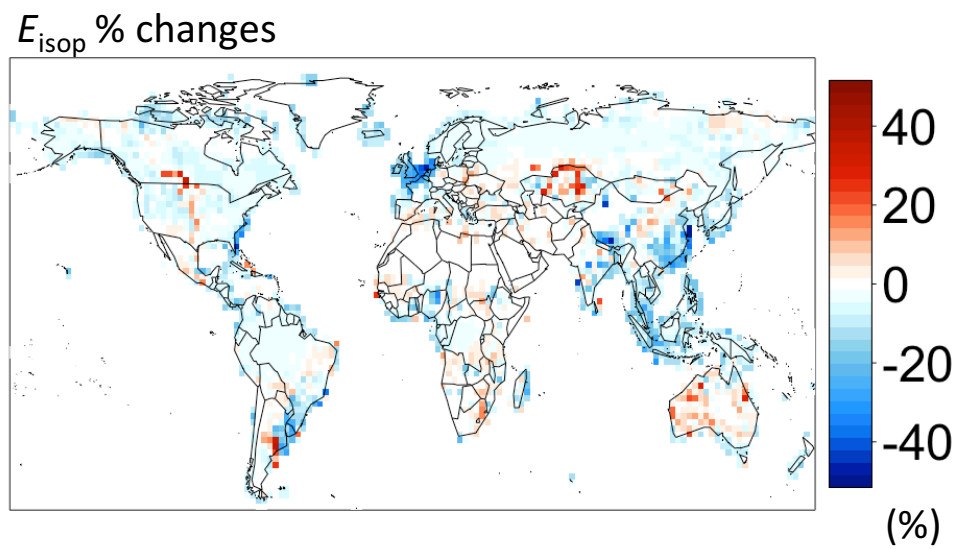

**Figure S7:** Percentage changes in isoprene emission rate between the *[Affected LAI]* case and *[Intact LAI]* case in summer (JJA mean).

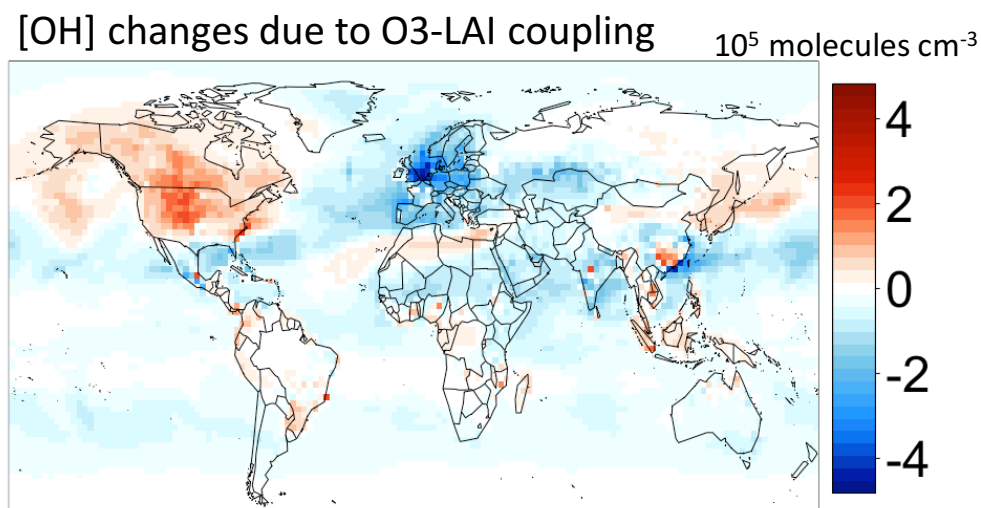

**Figure S8:** Absolute changes in OH concentration between the *[Affected LAI]* case and *[Intact LAI]* case in summer.

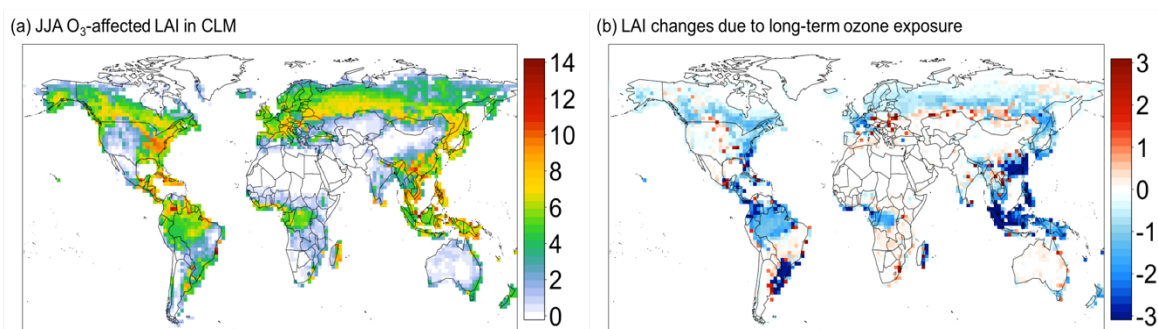

**Figure S9:** (a) Steady-state leaf area index (LAI) affected by long-term ozone exposure in summer (JJA mean) simulated by the Community Land Model (CLM); and (b) differences between ozone-affected LAI in (a) and intact LAI unaffected by ozone in the control case. Results are for asynchronous O<sub>3</sub>-LAI coupling described in Sect. 5 of the main text.



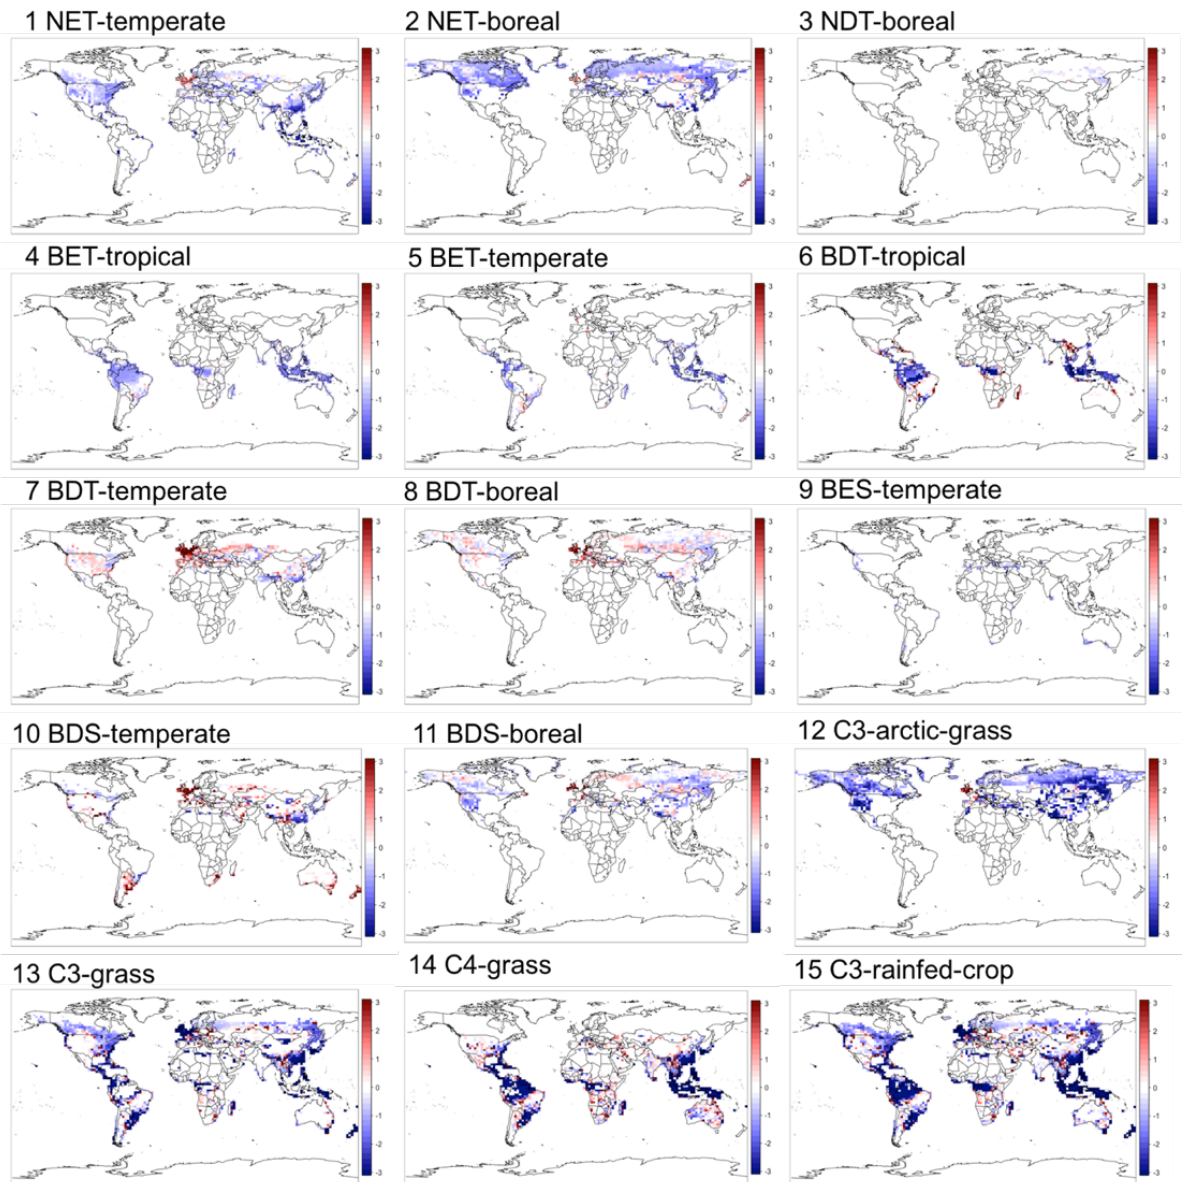

**Figure S10:** Changes in PFT-level leaf area index (LAI) between ozone-affected PFT-level LAI and intact PFT-level LAI unaffected by ozone simulated by CLM in summer. Results are for asynchronous  $O_3$ -LAI coupling described in Sect. 5 of the main text.

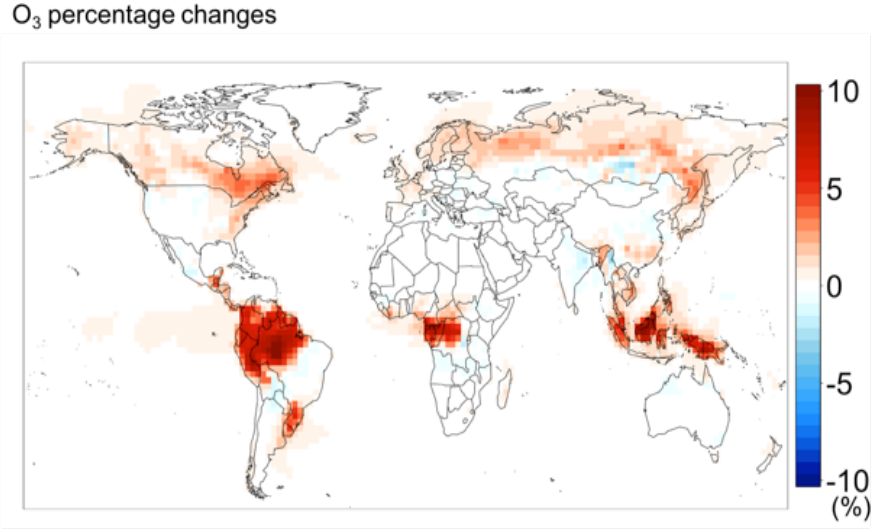

**Figure S11:** Percentage changes in surface ozone concentration between the *[Affected LAI]* and *[Intact LAI]* case in summer. Results are for asynchronous O<sub>3</sub>-LAI coupling described in Sect. 5 of the main text.

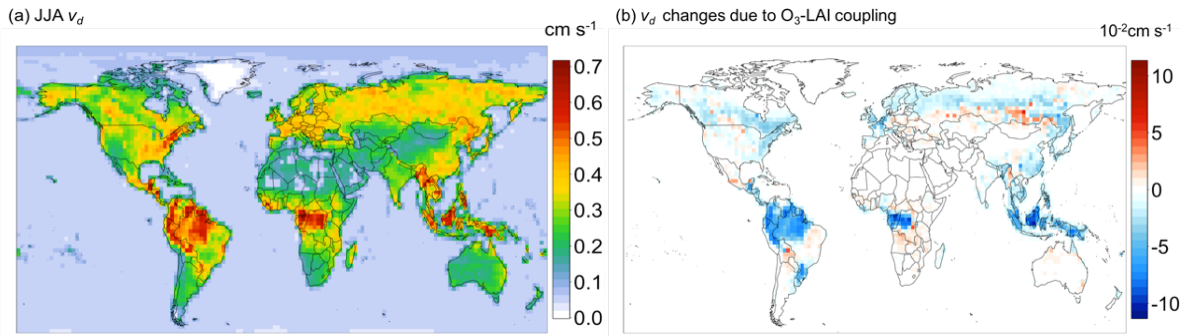

**Figure S12:** (a) Ozone dry deposition velocity ( $v_d$ ) in summer (JJA mean) from the *[Affected LAI]* case; and (b) differences in ozone dry deposition velocity between the *[Affected LAI]* and *[Intact LAI]* case (i.e., *[Affected LAI]* – *[Intact LAI]*). Results are for asynchronous O<sub>3</sub>-LAI coupling described in Sect. 5 of the main text.

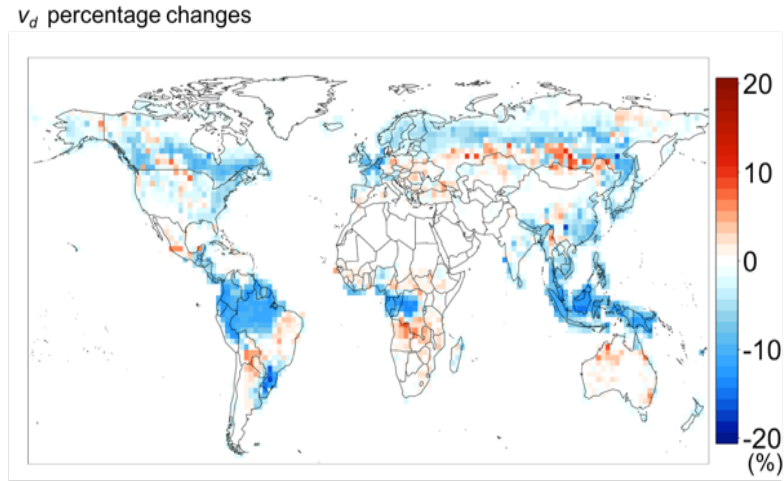

**Figure S13:** Percentage changes in summertime (JJA) ozone dry deposition velocity between the *[Affected LAI]* and *[Intact LAI]* case. Results are for asynchronous O<sub>3</sub>-LAI coupling described in Sect. 5 of the main text.

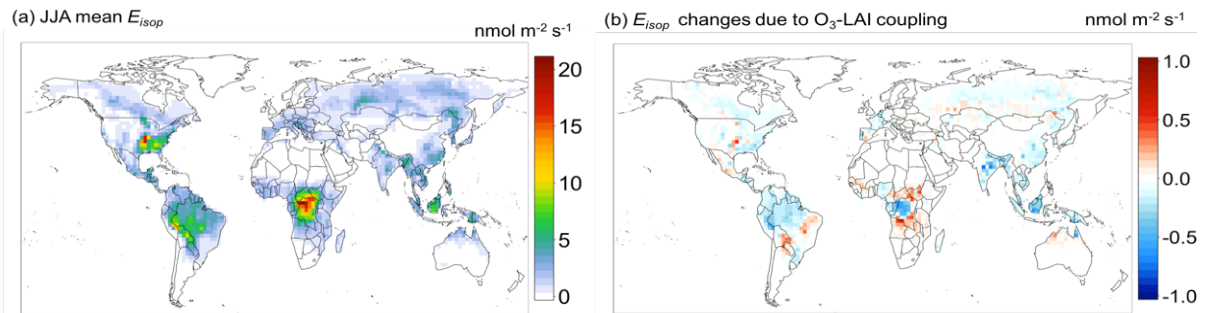

**Figure S14:** (a) Isoprene emission rate ( $E_{\text{isop}}$ ) in summer (JJA mean) from the *[Affected LAI]* case; and (b) differences in isoprene emission rate between the *[Affected LAI]* and *[Intact LAI]* case (i.e.,  $[Affected LAI] - [Intact LAI]$ ). Results are for asynchronous O<sub>3</sub>-LAI coupling described in Sect. 5 of the main text.

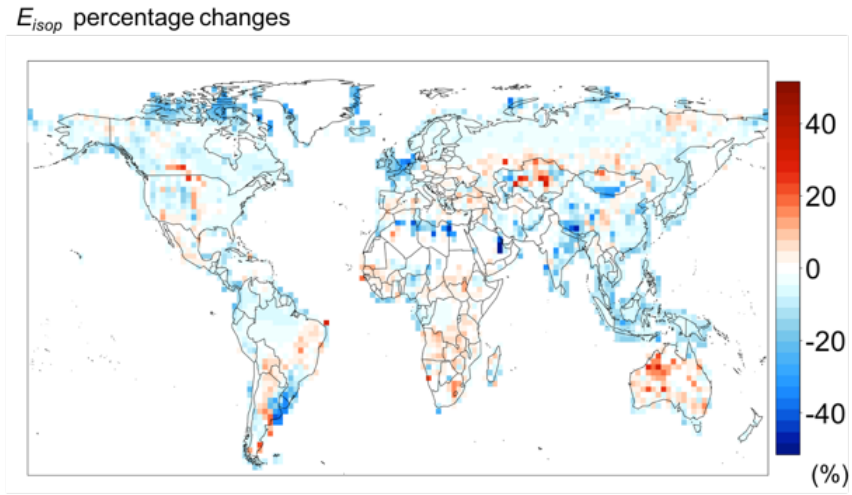

**Figure S15:** Percentage changes in isoprene emission rate between the *[Affected LAI]* and *[Intact LAI]* case in summer. Results are for asynchronous  $O_3$ -LAI coupling described in Sect. 5 of the main text.

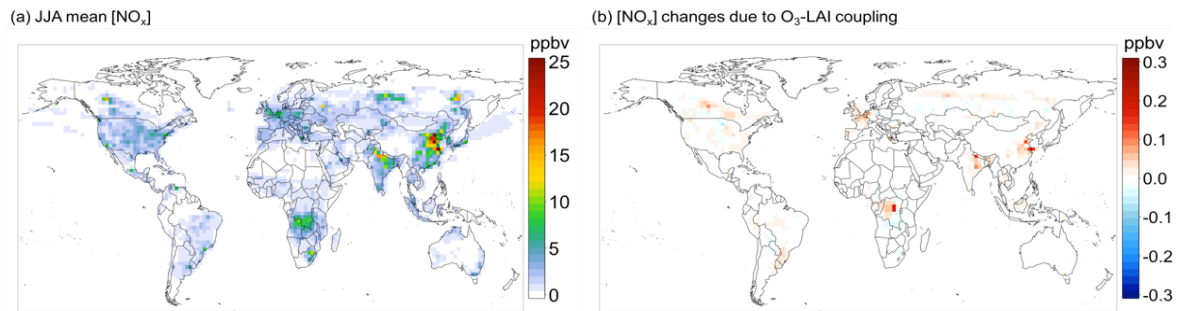

**Figure S16:** (a) Surface  $NO_x$  concentration in summer (JJA mean) from the *[Affected LAI]* case; and (b) differences in  $NO_x$  concentration between the *[Affected LAI]* and *[Intact LAI]* case (i.e.,  $[Affected LAI] - [Intact LAI]$ ). Results are for asynchronous  $O_3$ -LAI coupling described in Sect. 5 of the main text.
